# Supplementary material for: The effects of exogenous lipid on THP-1 cells: an in vitro model of airway aspiration?
Source: PubMed Central journal article supplement — ERJ Open Res. 2017 Mar 20;3(1):00026-2016. doi: 10.1183/23120541.00026-2016 (PMC5358527; doi:10.1183/23120541.00026-2016), 2017-03-20
Supplement: 00026-2016_Figure_S1.pdf [file 00026-2016_Figure_S1.pdf]

Supplemental figure 1

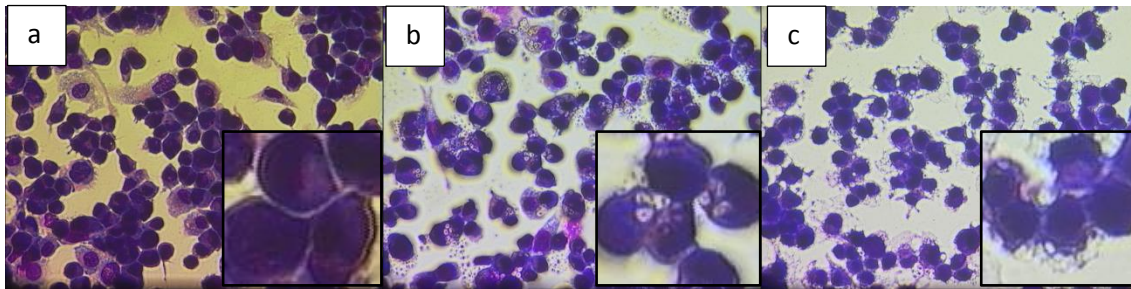

**Supplemental figure 1 – Inhibition of Phagocytosis**

PMA/THP-1 cells seeded onto glass cover-slips and pre-incubated with cytochalasin D for 1 hour before being incubated with zymosan beads. Cells were washed and differentially stained. Untreated cells (a) appeared large and round with cytoplasm staining pale purple whilst the nucleus stained dark purple. Cells treated with zymosan alone (b) showed cytoplasmic inclusions appearing as small white rings against the purple background. Cells pre-incubated with cytochalasin D (c) showed no cytoplasmic inclusions. Inset pictures are magnified representative regions of each treatment.
