# Supplementary material for: The effects of exogenous lipid on THP-1 cells: an in vitro model of airway aspiration?
Source: PubMed Central journal article supplement — ERJ Open Res. 2017 Mar 20;3(1):00026-2016. doi: 10.1183/23120541.00026-2016 (PMC5358527; doi:10.1183/23120541.00026-2016), 2017-03-20
Supplement: 00026-2016_Figure_S2.pdf [file 00026-2016_Figure_S2.pdf]

Supplemental Figure 2

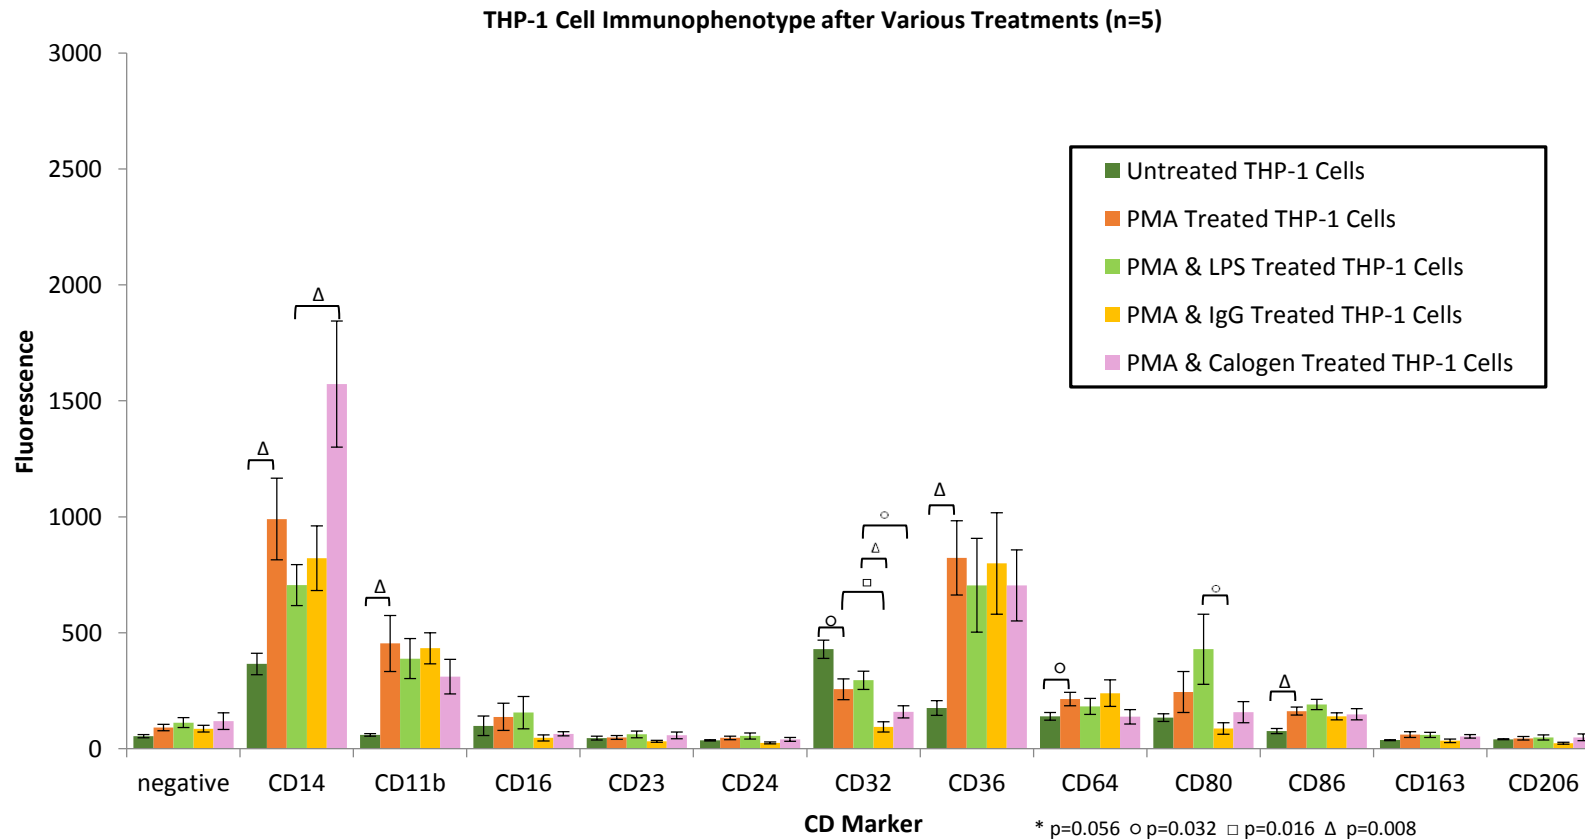

Supplemental Figure 2 – THP-1 cell immunophenotype

THP-1 and PMA/THP-1 cells were subjected to various treatments for 24 hours to induce monocyte to macrophage differentiation (PMA) and activated macrophage polarisation (LPS for M1 or IgG for M2). Cells were also treated with Calogen for comparison and all cells analysed for cell surface marker expression by flow cytometry. Statistically significant results are shown by horizontal brackets and the level of significance indicated by shape.
