# Supplementary material for: The effects of exogenous lipid on THP-1 cells: an in vitro model of airway aspiration?
Source: PubMed Central journal article supplement — ERJ Open Res. 2017 Mar 20;3(1):00026-2016. doi: 10.1183/23120541.00026-2016 (PMC5358527; doi:10.1183/23120541.00026-2016), 2017-03-20
Supplement: 00026-2016_Table_S1.pdf [file 00026-2016_Table_S1.pdf]

**Supplemental Table 1 – Top 10 up- and down- regulated genes following PMA treatment of THP-1 cells.**

| <b>Fold Change</b> | <b>Gene Symbol</b> | <b>Description</b>                                                                                                                                                                       | <b>Direction</b> | <b>p-value (corr)</b> |
|--------------------|--------------------|------------------------------------------------------------------------------------------------------------------------------------------------------------------------------------------|------------------|-----------------------|
| 1235.1             | MMP9               | Homo sapiens matrix metalloproteinase 9 (MMP9), mRNA [NM_004994] – enzyme involved in breakdown of extracellular matrix                                                                  | ↑                | 2.26E-13              |
| 1160.4             | SPOCD1             | Homo sapiens SPOC domain containing 1 (SPOCD1), mRNA [NM_144569] – transcription factor                                                                                                  | ↑                | 2.50E-10              |
| 843.4              | SPP1               | Homo sapiens secreted phosphoprotein 1 (SPP1), transcript variant 1, mRNA [NM_001040058] – interacts with osteoclasts                                                                    | ↑                | 4.50E-12              |
| 728.2              | RGS1               | Homo sapiens regulator of G-protein signaling 1 (RGS1), mRNA [NM_002922] - modulates G-protein signalling                                                                                | ↑                | 1.25E-10              |
| 641.1              | A2M                | Homo sapiens alpha-2-macroglobulin (A2M), mRNA [NM_000014] – cytokine transporter                                                                                                        | ↑                | 6.04E-16              |
| 563.0              | SLCO2B1            | Homo sapiens solute carrier organic anion transporter family, member 2B1 (SLCO2B1), transcript variant 1, mRNA [NM_007256] – involved in sodium independent transport of organic anions. | ↑                | 1.29E-14              |
| 561.1              | CD163              | Homo sapiens CD163 molecule (CD163), transcript variant 1, mRNA [NM_004244]                                                                                                              | ↑                | 7.62E-09              |
| 416.4              | HAVCR2             | Homo sapiens hepatitis A virus cellular receptor 2 (HAVCR2), mRNA [NM_032782] – involved in macrophage activation                                                                        | ↑                | 7.39E-13              |

|       |          |                                                                                                                                                                                                                                        |   |                                                                                                    |          |
|-------|----------|----------------------------------------------------------------------------------------------------------------------------------------------------------------------------------------------------------------------------------------|---|----------------------------------------------------------------------------------------------------|----------|
| 359.0 | ADAMDEC1 | Homo sapiens ADAM-like, decysin 1                                                                                                                                                                                                      | ↑ | (ADAMDEC1), transcript variant 2, mRNA [NM_001145271] – may be involved in dendritic cell function | 6.89E-13 |
| 319.6 | SLC7A8   | Homo sapiens solute carrier family 7 (amino acid transporter light chain, L system), member 8 (SLC7A8), transcript variant 2, mRNA [NM_182728] - unknown                                                                               | ↑ |                                                                                                    | 5.80E-11 |
| 75.3  | MT1M     | Homo sapiens metallothionein 1M (MT1M), mRNA [NM_176870] – binds heavy metals                                                                                                                                                          | ↓ |                                                                                                    | 4.07E-06 |
| 69.9  | SEMG1    | Homo sapiens semenogelin I (SEMG1), mRNA [NM_003007] – found in abundance in semen forming a gel matrix                                                                                                                                | ↓ |                                                                                                    | 1.02E-08 |
| 68.3  | AKR1C4   | Homo sapiens aldo-keto reductase family 1, member C4 (chlordecone reductase; 3-alpha hydroxysteroid dehydrogenase, type I; dihydrodiol dehydrogenase 4) (AKR1C4), mRNA [NM_001818] – enzyme reducing aldehydes and ketones to alcohols | ↓ |                                                                                                    | 5.17E-08 |
| 52.8  | WNT7B    | Homo sapiens wingless-type MMTV integration site family, member 7B (WNT7B), mRNA [NM_058238] – involved in embryogenesis                                                                                                               | ↓ |                                                                                                    | 2.04E-10 |
| 47.3  | MS4A3    | Homo sapiens membrane-spanning 4-domains, subfamily A, member 3 (hematopoietic cell-specific) (MS4A3), transcript variant 1, mRNA [NM_006138] – involved in cell cycle transition                                                      | ↓ |                                                                                                    | 2.67E-08 |
| 42.9  | PPP1R27  | Homo sapiens protein phosphatase 1,                                                                                                                                                                                                    | ↓ |                                                                                                    | 2.57E-05 |

|      |         |                                                                                                                                                     |                           |
|------|---------|-----------------------------------------------------------------------------------------------------------------------------------------------------|---------------------------|
|      |         | regulatory subunit 27 (PPP1R27), mRNA<br>[NM_001007533] – inhibits protein<br>phosphatase 1                                                         |                           |
| 39.6 | NACAP1  | Homo sapiens nascent-polypeptide-associated<br>complex alpha polypeptide pseudogene 1<br>(NACAP1), non-coding RNA [NR_002182] –<br>unknown function | ↓<br><br><br><br>8.56E-14 |
| 39.6 | PPP1R27 | Homo sapiens protein phosphatase 1,<br>regulatory subunit 27 (PPP1R27), mRNA<br>[NM_001007533] – inhibits protein<br>phosphatase 1                  | ↓<br><br><br><br>4.81E-09 |
| 37.0 | SET     | Homo sapiens SET nuclear oncogene (SET),<br>transcript variant 2, mRNA [NM_003011] –<br>inhibits nucleosome acetylation                             | ↓<br><br><br>4.88E-13     |
| 33.9 |         | AY904369 cell cycle-related kinase cardiac<br>splice variant (Mus musculus) (exp=-1; wgp=0;<br>cg=0), partial (12%) [THC2752005]                    | ↓<br><br><br>4.05E-06     |
