# Supplementary material for: The effects of exogenous lipid on THP-1 cells: an in vitro model of airway aspiration?
Source: PubMed Central journal article supplement — ERJ Open Res. 2017 Mar 20;3(1):00026-2016. doi: 10.1183/23120541.00026-2016 (PMC5358527; doi:10.1183/23120541.00026-2016), 2017-03-20
Supplement: 00026-2016_Table_S2.pdf [file 00026-2016_Table_S2.pdf]

**Supplemental Table 2. Markers used in immunophenotyping**

| <b>Specificity</b> | <b>Description</b>                                                                               |
|--------------------|--------------------------------------------------------------------------------------------------|
| <b>CD11b</b>       | $\alpha$ M2 integrin commonly used as a monocyte to macrophage differentiation marker            |
| <b>CD14</b>        | Pattern recognition receptor which binds LPS and is expressed by human monocytes and macrophages |
| <b>CD16</b>        | Low affinity Fc $\gamma$ RIII receptor up-regulated in M1 activated macrophages                  |
| <b>CD23</b>        | Low-affinity Fc $\epsilon$ RII receptor up-regulated on M2 activated macrophages                 |
| <b>CD24</b>        | Adhesion molecule expressed by granulocytes but not macrophages                                  |
| <b>CD32</b>        | Low affinity Fc $\gamma$ RII receptor up-regulated on M1 activated macrophages                   |
| <b>CD36</b>        | Class B scavenger receptor which binds long chain fatty acids and oxLDL                          |
| <b>CD64</b>        | High affinity Fc $\gamma$ RI receptor up-regulated in M1 activated macrophages                   |
| <b>CD80</b>        | T-cell co-stimulatory molecule required for TH1 differentiation                                  |
| <b>CD86</b>        | T-cell co-stimulatory molecule required for TH2 differentiation                                  |
| <b>CD163</b>       | Hb scavenger receptor up-regulated on M2 activated macrophages                                   |
| <b>CD206</b>       | Mannose receptor up-regulated on M2 macrophages                                                  |
